# Supplementary material for: Solution synthesis of conveyor-like MnSe nanostructured architectures with an unusual core/shell magnetic structure
Source: Royal Society of Chemistry journal article supplement (doi:10.1039/c7ce00491e), 2017-01-01
Supplement: c7ce00491e9.pdf [file c7ce00491e9.pdf]

## Supporting information

### Solution synthesis of conveyor-like MnSe nanostructured architectures with an unusual core/shell magnetic structure

Xinyi Yang,<sup>a</sup> Bo Zhou,<sup>a</sup> Yingjin Wei<sup>b</sup> and Bo Zou\*,<sup>a</sup>

<sup>a</sup> State key Laboratory of Superhard Materials, Jilin University, Changchun, 130012, China.

E-mail: zoubo@jlu.edu.cn,

<sup>b</sup> Key Laboratory of Physics and Technology for Advanced Batteries (Ministry of Education), College  
of Physics, Jilin University, Changchun, 130012, China

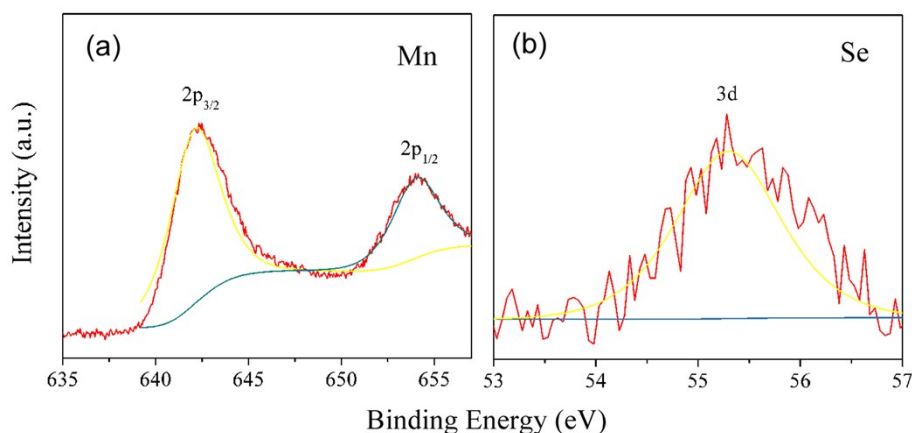

**Fig. S1** The typical XPS analysis of the as-prepared WZ-MnSe nanoconveyors, (a) Mn 2p region, and (b) Se 3d region. The two distinct peaks of 642.2 and 653.9 eV are assigned to Mn  $2p_{3/2}$  and Mn  $2p_{1/2}$  core level, respectively, which can be used as a fingerprint to identify the presence of Mn(II), and the fitting peaks centered at 55.3 eV is consistent with Se 3d core level.<sup>S1</sup>

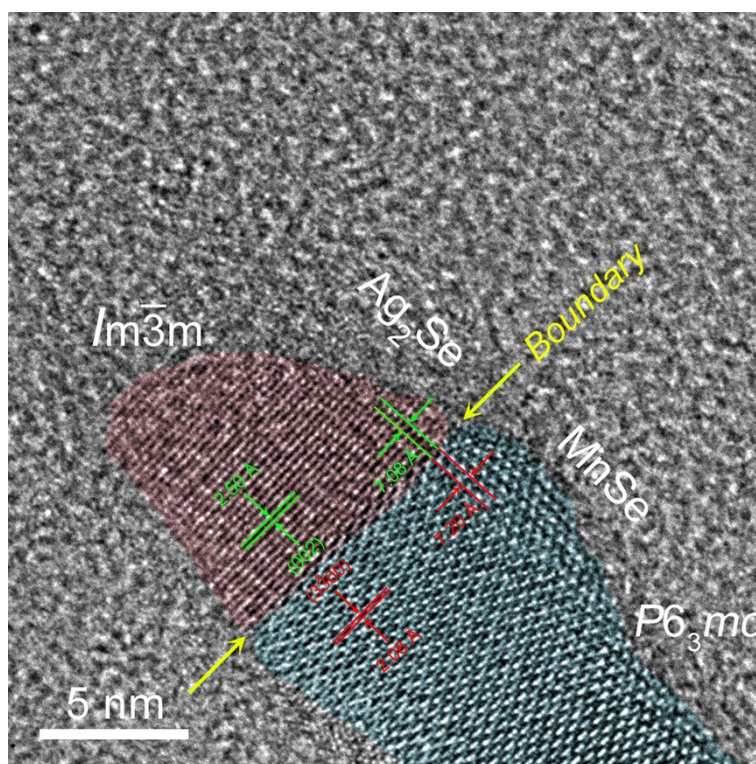

**Fig. S2** HRTEM image of the endpoint in a NW. The two yellow arrowheads indicate the boundary between  $\text{Ag}_2\text{Se}$  and MnSe. The  $\text{Ag}_2\text{Se}$  nanoparticles can be indexed to the cubic phase with the space group of  $Im\bar{3}m$  ( $a = 4.99 \text{ \AA}$ ), and the MnSe NW has a WZ-type structure with the space group of  $P6_3mc$  ( $a = 4.16 \text{ \AA}$ ,  $c = 6.70 \text{ \AA}$ ). Along the interfaces, the mismatch value between MnSe  $(1\bar{1}00)[11\bar{2}0]$  and  $\text{Ag}_2\text{Se} (002)[110]$  is  $\sim 1.7 \%$ , the mismatch of MnSe  $(1\bar{1}00)[0001]$  and  $\text{Ag}_2\text{Se} (002)[110]$  is  $\sim 5.5 \%$ , and the mismatch for MnSe  $(0002)[3\bar{3}00]$  and  $\text{Ag}_2\text{Se} (002)[110]$  is  $\sim 16 \%$ , as calculated using the standard cell parameters.

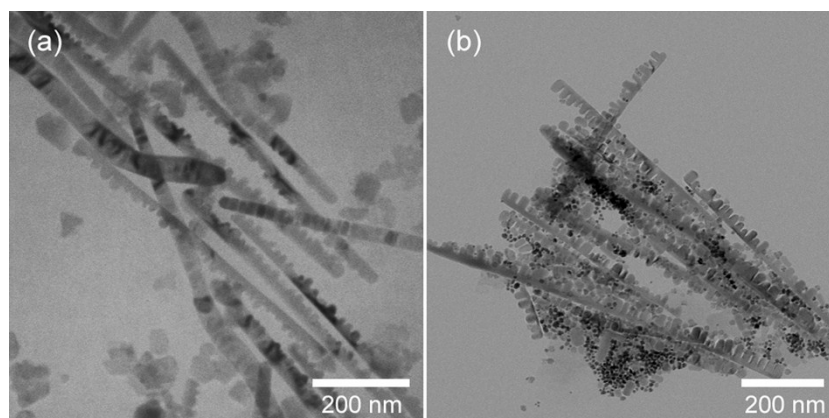

**Fig. S3** TEM images of the sample obtained at different amount of Ag nanoparticle solution: (a) 0.05 mL, and (b) 0.2 mL.

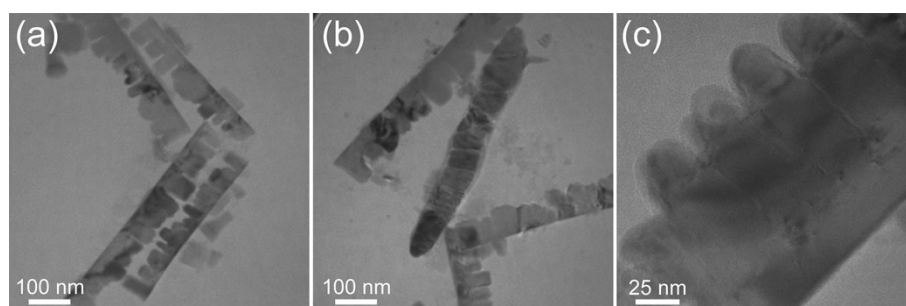

**Fig. S4** (a, b) low-, (c) high-magnification TEM images of the synthesized MnSe nanosaws with thick teeth.

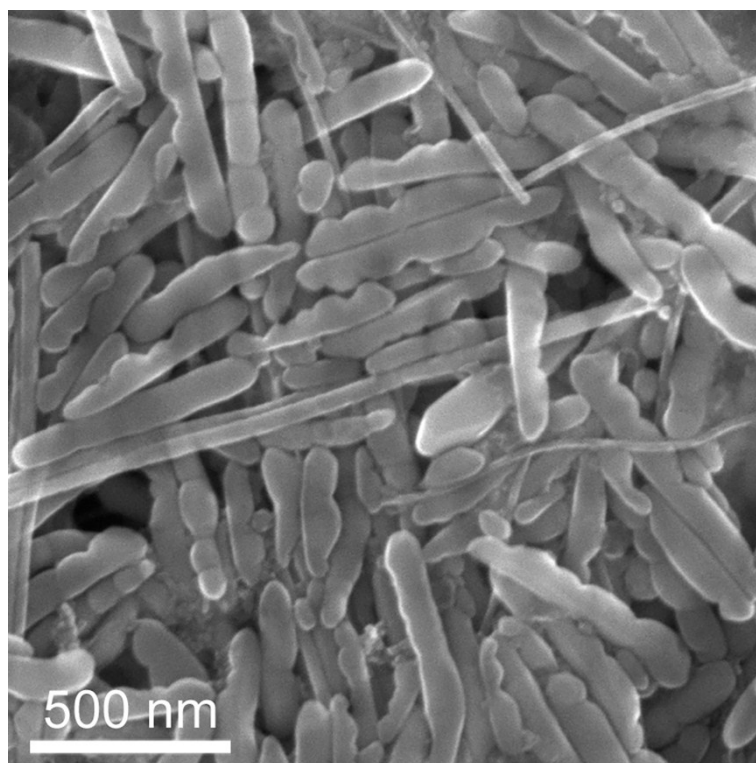

**Fig. S5** SEM images of the synthesized MnSe nanopods.

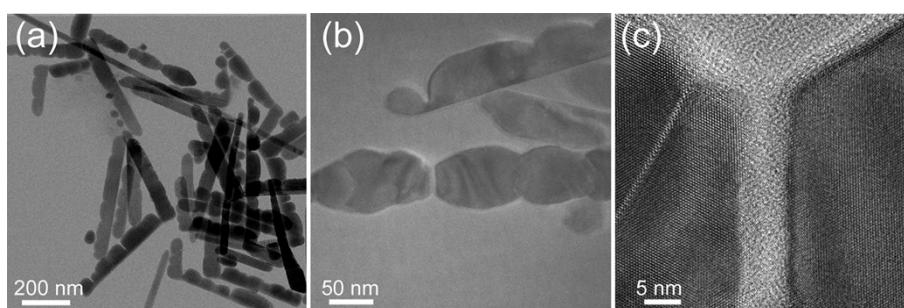

**Fig. S6** (a) low-, (b) high-magnification TEM images, (c) HRTEM image of the synthesized MnSe nanocondyles.

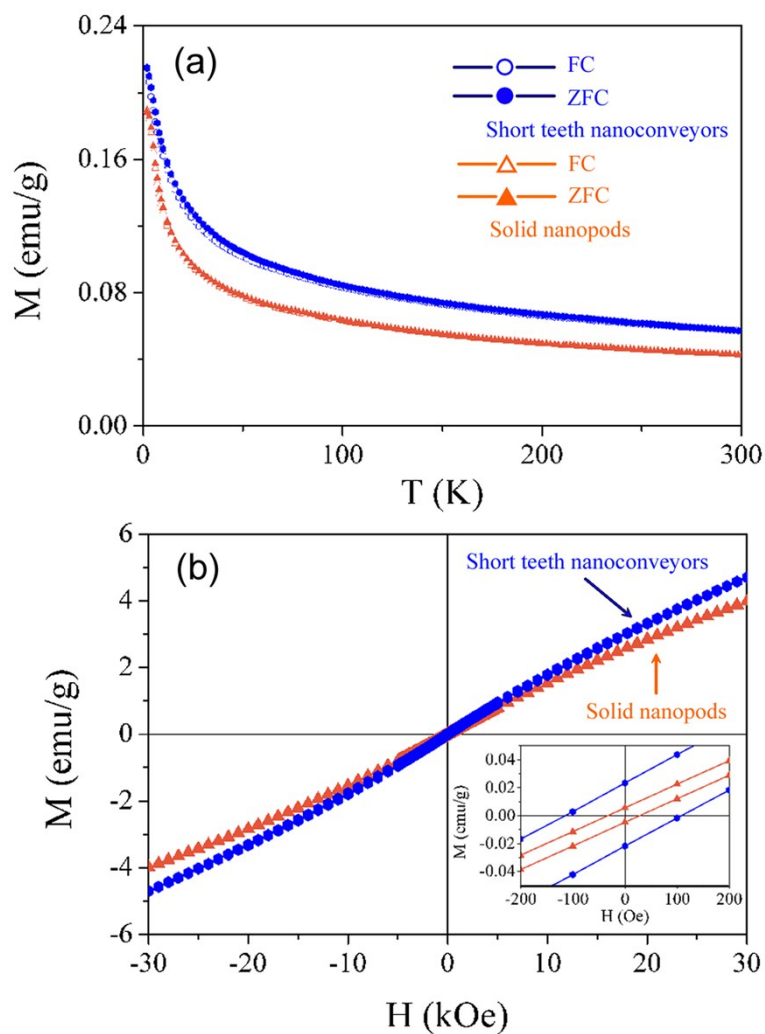

**Fig. S7** (a) Temperature dependence of FC and ZFC susceptibility, (b) hysteresis loops at 5 K for the short teeth nanoconveyors obtained at 300 °C, 3 min and solid nanopods.

[S1] T. Qin, J. Lu, S. Wei, P. Qi, Y. Peng, Z. Yang, Y. Qian, *Inorg. Chem. Commun.*, 2002, **5**, 369–371.
