# Supplementary figures and images for: Solution synthesis of conveyor-like MnSe nanostructured architectures with an unusual core/shell magnetic structure
Source: Royal Society of Chemistry journal article supplement (doi:10.1039/c7ce00491e), 2017-01-01

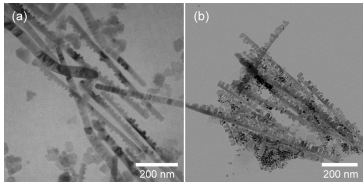

Supplement: c7ce00491e4.pdf [file c7ce00491e4.pdf]

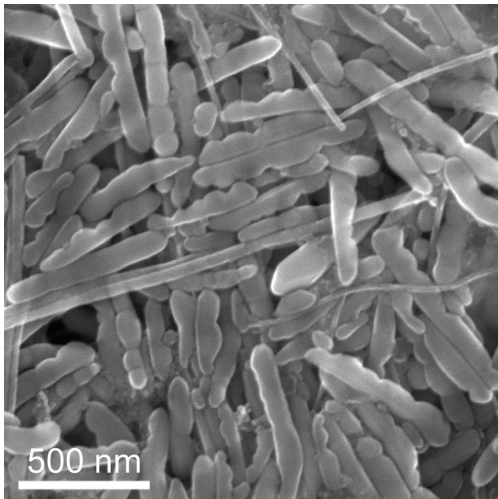

Supplement: c7ce00491e6.pdf [file c7ce00491e6.pdf]
